# Supplementary material
Source: PubMed Central journal article supplement (PMC3765156)
Supplement: NIHMS2372-supplement-supplement_1.pdf [file NIHMS2372-supplement-supplement_1.pdf]

## **Additional files**

**Supplementary Figure 1** – Schematic representation of human Myc mutants, isoforms, and family members

Attached – Supplementary Figure 1

**Supplementary Figure 2** – Representative images of colony formation in Myc transformed MCF10A, SH-EP, and LF1/3T cells

Attached – Supplementary Figure 2

**Supplementary Figure 3** – Myc dependent cell death in MCF10A cells

Attached – Supplementary Figure 3

**Supplementary Table 1** - Review of structure-function data for Myc-dependent transformation

Attached – Supplementary Table 1

# Supplementary Figure 1: Schematic representation of human Myc mutants, isoforms, and family members

## A Wild-type human c-Myc

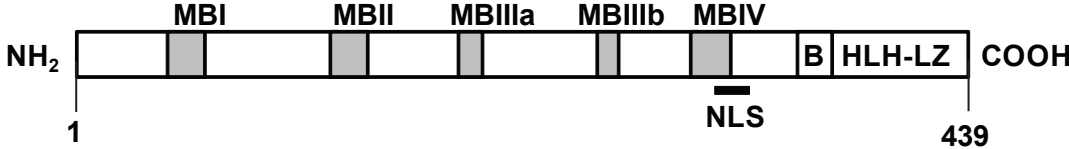

## B c-Myc NTD mutants

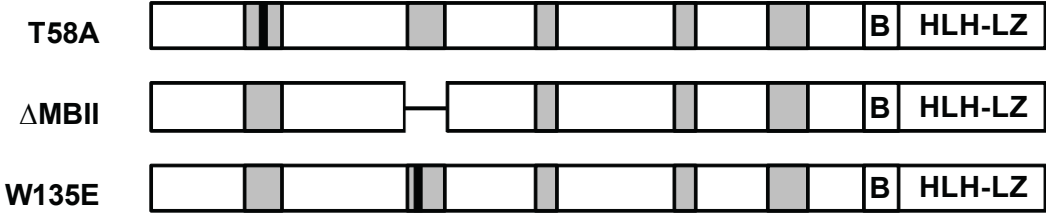

## C c-Myc isoform

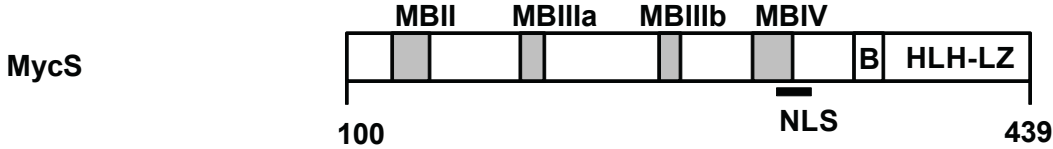

## D c-Myc family members

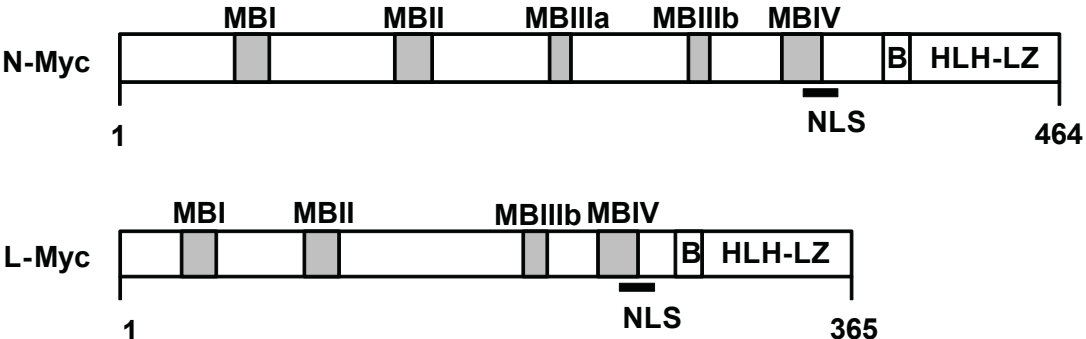

# Supplementary Figure 2: Representative images of colony formation in Myc-transformed MCF10A, SH-EP and LF1/3T cells

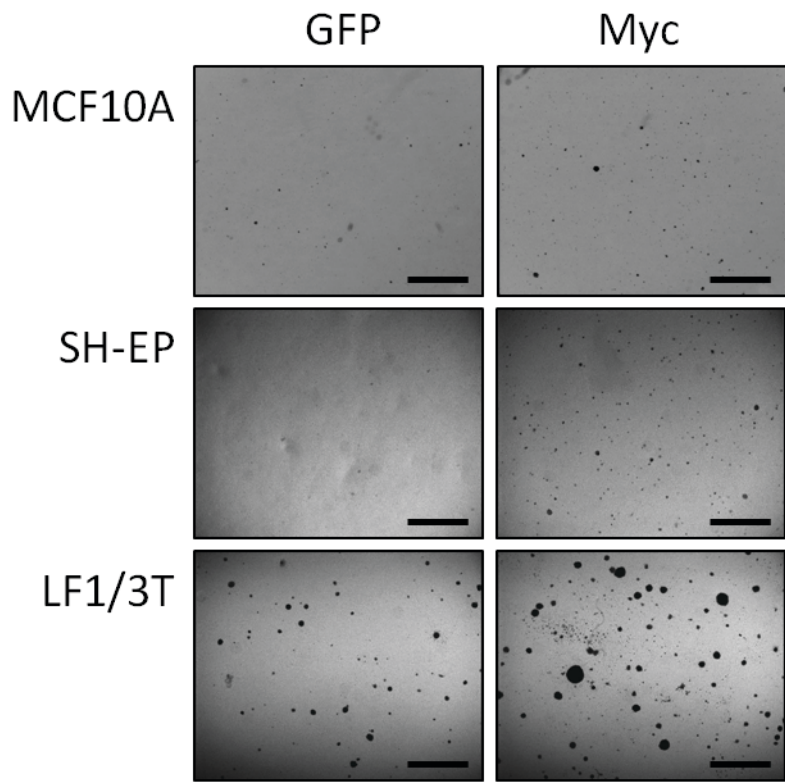

Figure Legend: Soft agar colony formation was imaged on a Leica MZ FLIII Stereomicroscope at 1.6x magnification. Scale bar, 2 mm.

# Supplementary Figure 3: Myc-induced cell death in MCF10A cells

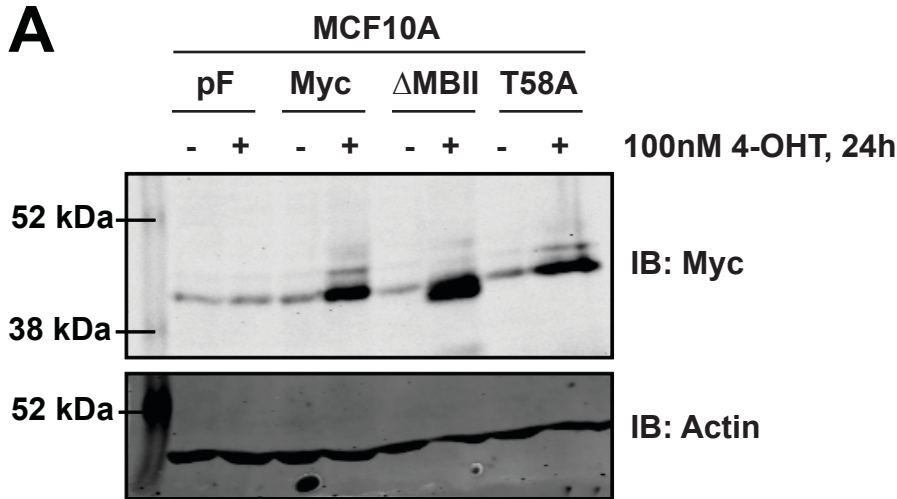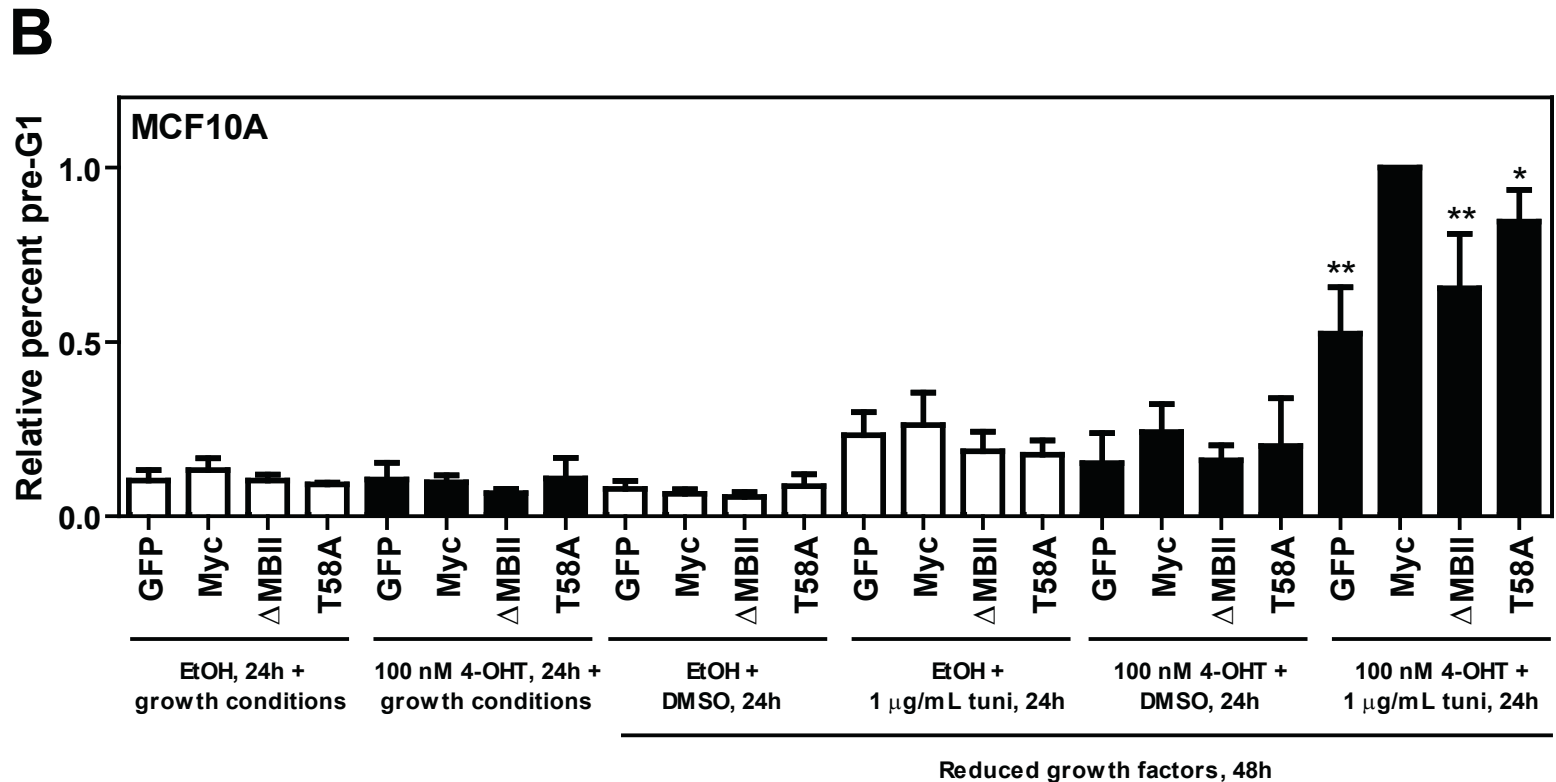

**Figure Legend:** A) MCF10A cells were stably infected to express 4-hydroxytamoxifen (4-OHT) inducible Myc and Myc mutants (Callus *et al*, 2008). Inducible expression was evaluated by western blotting. Briefly, cells were treated with ethanol control or 100 nM 4-OHT for 24 hours in reduced growth factor media (0.05% horse serum and supplemented with only 10  $\mu$ L/mL insulin). B) Myc-dependent cell death was evaluated by treating MCF10A cells with 1  $\mu$ g/mL tunicamycin (tuni) with concurrent induction of Myc and Myc mutants. Briefly, MCF10A cells were treated with growth factor reduced media for 24 hours and then subsequently treated with 4-OHT (to induce Myc expression) and tunicamycin for an additional 24 hours. Cell death was measured by fixed propidium iodide cell cycle analysis and the percent pre-G1 population. Data is presented relative wild-type Myc, treated with treated with tunicamycin, with mean  $\pm$  standard deviation of 5 independent experiments. \* $p$ <0.05, \*\* $p$ <0.01, paired t-test. Only low levels of cell death were observed in all control samples.

**Supplementary Table 1: Summary of structure-function data for Myc-dependent transformation**

| <b>Model System</b>                | <b>Control</b> | <b>Myc</b> | <b>ΔMBII</b> | <b>T58A</b>    | <b>W135E</b> | <b>MycS</b>    | <b>L-Myc</b> | <b>N-Myc</b> | <b>Ref.</b>                                                                                                       |
|------------------------------------|----------------|------------|--------------|----------------|--------------|----------------|--------------|--------------|-------------------------------------------------------------------------------------------------------------------|
| REF Co-transformation <sup>1</sup> | -              | +          | -            | ++             | <i>nd</i>    | - <sup>2</sup> | - or +/-     | +            | Land, 1983; Stone, 1987; Birrer, 1988; Barrett, 1992; McMahon, 1998; Chang, 2000; Nikiforov, 2002; Pulverer, 2004 |
| Rat-1A                             | -              | +          | -            | + <sup>3</sup> | -            | +              | +            | +            | Small, 1987; Xiao, 1998; Conzen, 2000; Prescott, 2001; Oster, 2003; Huang, 2005; O'Donnell, 2006                  |
| Bone Marrow Transplant             | -              | +          | -            | ++             | <i>nd</i>    | <i>nd</i>      | <i>nd</i>    | <i>nd</i>    | Hemann, 2005; Herbst, 2005                                                                                        |
| HMEC                               | -              | +          | -            | ++             | <i>nd</i>    | <i>nd</i>      | <i>nd</i>    | <i>nd</i>    | Cowling, 2007; Thibodeaux, 2009                                                                                   |

<sup>1</sup> Myc-dependent transformation was evaluated by focus formation in rat embryo fibroblasts (REFs) co-transfected with activated H-Ras

<sup>2</sup> Evaluated through a deletion mutant spanning amino acids 1-110

<sup>3</sup> Data summarized here represents experiments conducted in 10% FBS. The T58A point mutant is able to promote transformation to a greater extent than wild-type Myc when experiments are conducted in 2% FBS.

-, does not promote transformation

+/-, promotes transformation to a lesser extent than wild-type Myc

+, promotes transformation to a similar extent as wild-type Myc

++, promotes transformation to a greater extent than wild-type Myc

*nd*, not determined
